# Supplementary material for: Solution-phase synthesis of group 3–5 transition metal chalcogenide inorganic nanomaterials
Source: Royal Society of Chemistry journal article supplement (doi:10.1039/d3cc01731a), 2023-01-01
Supplement: d3cc01731a1.pdf [file d3cc01731a1.pdf]

**Table S1. Reported Conditions for the Solution-Phase Synthesis of Group 3-5 Chalcogenide Nanomaterials<sup>a</sup>**

| Material          | Methodology                                             | Metal Precursor(s)             | Chalcogenide Precursor | Temp. <sup>b</sup>                         | Reaction Time <sup>c</sup> | Solvent/Ligands <sup>d</sup> | Stoichiometry (M:(M'):E) <sup>e</sup> | Total Solvent <sup>f</sup> | Scale (mmol) <sup>g</sup> | Yield <sup>h</sup> | Morphology/Size                                           | Ref. |
|-------------------|---------------------------------------------------------|--------------------------------|------------------------|--------------------------------------------|----------------------------|------------------------------|---------------------------------------|----------------------------|---------------------------|--------------------|-----------------------------------------------------------|------|
| NaYS <sub>2</sub> | Continuous supply of H <sub>2</sub> S gas at high temp. | Na(acac), Y(acac) <sub>3</sub> | H <sub>2</sub> S       | 280 °C                                     | 1 h                        | HDA, ODE (1:1 mol:mol)       | 2:1:16                                | 20 mmol                    | 0.5                       |                    | Hexagonal plates, 50-100 nm                               | 1    |
| TiS <sub>2</sub>  | Heat-up                                                 | TiCl <sub>4</sub>              | Elemental S            | 215 °C                                     | 12 h                       | OIAm                         | 1:2                                   | 9 mL                       | 0.91                      |                    | Single-layer nanodiscs (50 nm)                            | 2    |
|                   |                                                         |                                |                        |                                            | 1 h                        |                              | 1:4                                   |                            |                           |                    | Single-layer nanodiscs (34 nm)                            |      |
|                   |                                                         |                                |                        |                                            |                            |                              | 1:2                                   |                            |                           |                    | Single-layer nanodiscs (18 nm)                            |      |
| TiS <sub>2</sub>  | Hot-injection of titanium                               | TiCl <sub>4</sub>              | Elemental S            | 300 °C                                     | 10 min                     | ODE                          | 1:6                                   | 20 mL                      | 1.0                       |                    | Flower-like clusters (non-colloidal)                      | 3    |
|                   | Hot-injection of titanium followed by heat-up           |                                |                        | Injection at 150 °C then heat-up to 300 °C |                            |                              |                                       |                            |                           |                    | Clusters of nanoflakes (non-colloidal)                    |      |
| TiS <sub>2</sub>  | Hot-injection of titanium followed by heat-up           | TiCl <sub>4</sub>              | Elemental S            | Injection at 250 °C then heat-up to 300 °C | 90 min                     | OIAm, OIAc (7:1 vol:vol)     | 1:6                                   | 16 mL                      | 1.0                       |                    | Inorganic fullerene nanoparticles (range of sizes/shapes) | 4    |
| TiS <sub>2</sub>  | Heat-up                                                 |                                |                        | 300 °C                                     |                            |                              |                                       |                            |                           |                    | Hollow inorganic fullerene nanospheres (250-400 nm)       |      |
| TiS <sub>2</sub>  | Heat-up                                                 | TiCl <sub>4</sub>              | Elemental S            | 300 °C                                     | 3 h                        | OIAm                         | 1:12.5                                | 5 mL                       | 0.4                       |                    | Multilayer nanosheets (~500 nm X ~5 nm)                   | 5    |
|                   |                                                         |                                |                        |                                            |                            | DDA                          |                                       |                            |                           |                    | Nanorods                                                  |      |

| Material          | Methodology                       | Metal Precursor(s) | Chalcogenide Precursor | Temp. <sup>b</sup> | Reaction Time <sup>c</sup> | Solvent/Ligands <sup>d</sup> | Stoichiometry (M:(M'):E) <sup>e</sup> | Total Solvent <sup>f</sup> | Scale (mmol) <sup>g</sup> | Yield <sup>h</sup> | Morphology/Size                            | Ref. |
|-------------------|-----------------------------------|--------------------|------------------------|--------------------|----------------------------|------------------------------|---------------------------------------|----------------------------|---------------------------|--------------------|--------------------------------------------|------|
|                   |                                   |                    |                        |                    |                            | TOPO                         |                                       |                            |                           |                    | "random" shapes and sizes of nanoparticles |      |
| TiS <sub>2</sub>  | Hot-injection of sulfur precursor | TiCl <sub>4</sub>  | CS <sub>2</sub>        | 300 °C             | 15 min                     | OIAm                         | 1:3.3                                 | 11.2 mmol                  | 2.0                       |                    | Nanodiscs (~100 nm)                        | 6    |
|                   |                                   |                    |                        |                    |                            |                              |                                       |                            | 1.5                       |                    | Nanodiscs (~150 nm)                        |      |
|                   |                                   |                    |                        |                    |                            |                              |                                       |                            | 3.6                       |                    | Nanodiscs (~40 nm)                         |      |
| TiS <sub>2</sub>  | Heat-up                           | TiCl <sub>4</sub>  | DDT                    | 230 °C             | 11 h                       | OIAm                         | 1:19                                  | 18.7 mmol                  | 0.26                      |                    | Single-layer nanosheets (300 nm – 1 μm)    | 7    |
| TiSe <sub>2</sub> | Heat-up                           | TiCl <sub>4</sub>  | Se                     | 300 °C             | 30 min                     | OIAm                         | 1:2                                   | 6.0 mmol                   | 0.5                       |                    | Hexagonal plates, 250 nm X 30 nm           | 6    |
| ZrS <sub>2</sub>  | Hot injection of sulfur precursor | ZrCl <sub>4</sub>  | CS <sub>2</sub>        | 300 °C             | 1 h                        | OIAm                         | 1:3.3                                 | 18.7 mmol                  | 1.5                       | ~100 mg            | Nanodiscs (20 nm)                          | 8    |
|                   |                                   |                    |                        |                    | 3 h                        |                              |                                       |                            |                           |                    | Nanodiscs (35 nm)                          |      |
|                   |                                   |                    |                        |                    | 6 h                        |                              |                                       |                            |                           |                    | Nanodiscs (60 nm)                          |      |
| ZrS <sub>2</sub>  | Heat-up                           | ZrCl <sub>4</sub>  | DDT                    | 245 °C             | 10 h                       | OIAm                         | 1:16.7                                | 18.7 mmol                  | 0.3                       |                    | Single-layer nanosheets (200-500 nm)       | 7    |
| ZrSe <sub>3</sub> | Heat-up                           | ZrCl <sub>4</sub>  | Se                     | 300 °C             | 1 h                        | OIAm                         | 1:2                                   | 14.9 mmol                  | 0.73                      |                    | Irregular nanoplatelets (20 nm)            | 6    |
| HfS <sub>2</sub>  | Hot injection of sulfur precursor | HfCl <sub>4</sub>  | CS <sub>2</sub>        | 300 °C             | 12 h                       | OIAm                         | 1:6.9                                 | 11.2 mmol                  | 0.73                      |                    | Nanodiscs (20 nm)                          | 6    |
| HfS <sub>2</sub>  | Heat-up                           | HfCl <sub>4</sub>  | DDT                    | 245 °C             | 10 h                       | OIAm                         | 1:14.8                                | 18.7 mmol                  | 0.77                      |                    | Single-layer nanosheets (~500 nm)          | 7    |
| HfSe <sub>3</sub> | Heat-up                           | HfCl <sub>4</sub>  | Se                     | 300 °C             | 12 h                       | OIAm                         | 1:2                                   | 11.2 mmol                  | 0.73                      |                    | Irregular nanoplatelets (90 nm)            | 6    |

| Material           | Methodology                                             | Metal Precursor(s)                                                                                                   | Chalcogenide Precursor | Temp. <sup>b</sup>                         | Reaction Time <sup>c</sup> | Solvent/Ligands <sup>d</sup> | Stoichiometry (M:(M'):E) <sup>e</sup> | Total Solvent <sup>f</sup>           | Scale (mmol) <sup>g</sup> | Yield <sup>h</sup>         | Morphology/Size                             | Ref. |
|--------------------|---------------------------------------------------------|----------------------------------------------------------------------------------------------------------------------|------------------------|--------------------------------------------|----------------------------|------------------------------|---------------------------------------|--------------------------------------|---------------------------|----------------------------|---------------------------------------------|------|
| BaTiS <sub>3</sub> | Hot-injection of sulfur precursor                       | Ba{N(SiMe <sub>3</sub> ) <sub>2</sub> } <sub>2</sub> (THF) <sub>2</sub> , Ti(NMe <sub>2</sub> ) <sub>4</sub>         | N,N'-diethylthiourea   | 360 °C                                     | 30 min                     | OIAm                         | 1:1:30                                | 3.7 mL                               | 0.1                       |                            | Nanorods (60-100 nm X ~6 nm)                | 9    |
|                    | Heat-up                                                 |                                                                                                                      |                        |                                            | 2 h                        |                              |                                       |                                      |                           |                            | Roughly spherical nanoparticles (~10-20 nm) |      |
| BaTiS <sub>3</sub> | Heat-up                                                 | Ba(S <sub>2</sub> CNR <sub>2</sub> ) <sub>2</sub> , Ti(S <sub>2</sub> CN <sup>i</sup> Pr <sub>2</sub> ) <sub>4</sub> | -- <sup>i</sup>        | 350 °C                                     | 30 min                     | OIAm                         | 2:1:-- <sup>i</sup>                   | 3.7 mL                               | 0.05                      |                            | Nanorods                                    | 10   |
| BaZrS <sub>3</sub> | Heat-up                                                 | Ba{N(SiMe <sub>3</sub> ) <sub>2</sub> } <sub>2</sub> (THF) <sub>2</sub> , Zr(NMe <sub>2</sub> ) <sub>4</sub>         | N,N'-diethylthiourea   | 365 °C                                     | 1 h                        | OIAm                         | 1:2:60                                | 1.2 mL (0.08 M in Ba <sup>2+</sup> ) | 0.1                       | 48%                        | Platelets (~20 nm)                          | 11   |
| BaZrS <sub>3</sub> | Heat-up                                                 | Ba(S <sub>2</sub> CNBu <sub>2</sub> ) <sub>2</sub> , Zr(S <sub>2</sub> CNEt <sub>2</sub> ) <sub>4</sub>              | -- <sup>i</sup>        | 330 °C                                     | 0.5 – 18 h                 | OIAm                         | 1:1:-- <sup>i</sup>                   | 1 mL                                 | 0.244                     |                            | Multicrystalline platelet-like particles    | 12   |
| VS <sub>2</sub>    | Hot-injection of sulfur precursor                       | VCl <sub>4</sub>                                                                                                     | CS <sub>2</sub>        | 330 °C                                     | 6 h                        | OIAm                         | 1:6.9                                 | 18.7 mmol                            | 0.73                      |                            | Nanoplatelets (18 nm)                       | 6    |
| VS <sub>2</sub>    | Heat-up                                                 | V(acac) <sub>3</sub>                                                                                                 | S                      | 330 °C                                     | 6 h                        | OIAm                         | 1:2.4                                 | 25 mL                                | 0.5                       |                            | Nanoplatelets (~10-30 nm) <sup>k</sup>      | 13   |
|                    |                                                         |                                                                                                                      |                        |                                            |                            |                              | 1:9.6                                 |                                      |                           |                            | Nanoplatelets (~50-60 nm) <sup>k</sup>      |      |
| VSe <sub>2</sub>   | Heat-up                                                 | VCl <sub>4</sub>                                                                                                     | Se                     | 300 °C                                     | 1 h                        | OIAm                         | 1:2                                   | 11.2 mmol                            | 0.73                      |                            | Hexagonal nanoplatelets (150 nm)            | 6    |
| VSe <sub>2</sub>   | Heat-up                                                 | V(O)(acac) <sub>2</sub>                                                                                              | Se                     | 330 °C                                     | 1.5 h                      | OIAm                         | 1:2                                   | 10 mL                                | 0.3                       |                            | Monolayer nanosheets (80 nm)                | 14   |
|                    |                                                         |                                                                                                                      |                        |                                            |                            |                              |                                       | (not given)                          | 40                        |                            |                                             |      |
| VSe <sub>2</sub>   | Hot-injection of selenium precursor followed by heat-up | V(O)(acac) <sub>2</sub>                                                                                              | Se                     | Injection at 140 °C then heating to 250 °C | 2 h                        | OIAm, DDT (18:1 vol:vol)     | 1:2                                   | 19 mL                                | 0.5                       |                            | Nanosheets                                  | 15   |
| VSe <sub>2</sub>   | Heat-up                                                 | V(O)(acac) <sub>2</sub>                                                                                              | Se                     | 300 °C                                     | 4 h                        | OIAm, TDA (1:1 vol:vol)      | 1:2.7                                 | 100 mL                               | 1.5                       | (1.16 g, 91%) <sup>m</sup> | Aggregated nanosheets                       | 16   |

| Material          | Methodology                                            | Metal Precursor(s) | Chalcogenide Precursor                            | Temp. <sup>b</sup> | Reaction Time <sup>c</sup> | Solvent/Ligands <sup>d</sup> | Stoichiometry (M:(M'):E) <sup>e</sup> | Total Solvent <sup>f</sup> | Scale (mmol) <sup>g</sup> | Yield <sup>h</sup> | Morphology/Size                         | Ref. |
|-------------------|--------------------------------------------------------|--------------------|---------------------------------------------------|--------------------|----------------------------|------------------------------|---------------------------------------|----------------------------|---------------------------|--------------------|-----------------------------------------|------|
| VSe <sub>2</sub>  | Slow hot-injection of both precursors into hot solvent | VCl <sub>3</sub>   | (PhCH <sub>2</sub> ) <sub>2</sub> Se <sub>2</sub> | 280 °C             | 30 min                     | OIAm, ODE (15:5 vol:vol)     | 2:1                                   | 20 mL                      | 0.5                       |                    | Clusters of nanoflakes <sup>i</sup>     | 17   |
| NbS <sub>2</sub>  | Hot-injection of sulfur precursor                      | NbCl <sub>5</sub>  | CS <sub>2</sub>                                   | 300 °C             | 3 h                        | OIAm                         | 1:6.9                                 | 11.2 mmol                  | 0.73                      |                    | Irregular nanoparticles (100 nm)        | 6    |
| NbS <sub>2</sub>  | Hot-injection of sulfur precursor                      | NbCl <sub>5</sub>  | CS <sub>2</sub>                                   | 300 °C             | 3 h                        | OIAm                         | 1:60                                  | 6 g                        | 1                         |                    | Clusters of nanosheets <sup>k</sup>     | 18   |
| NbS <sub>2</sub>  | Hot-injection of sulfur precursor                      | NbCl <sub>5</sub>  | CS <sub>2</sub>                                   | 300 °C             | 3 h                        | OM                           | 1:35                                  | 20 mL                      | 0.23                      |                    | Stacked multilayer nanosheets           | 19   |
|                   |                                                        |                    |                                                   |                    | 2 h                        | OIAc, OIAm (0.3:1 mol:mol)   | 1:35                                  |                            |                           |                    | Hexagonal nanoplatelets, (106 X 9.5 nm) |      |
|                   |                                                        |                    |                                                   |                    | 2 h                        | OIAc, OIAm (0.3:1 mol:mol)   | 1:70                                  |                            |                           |                    | Nanohexagons (55 nm)                    |      |
|                   |                                                        |                    |                                                   |                    | 2 h                        | OIAc, OIAm (0.3:1 mol:mol)   | 1:140                                 |                            |                           |                    | Hexagonal nanorods (55 X 127 nm)        |      |
| NbS <sub>2</sub>  | Hot-injection of sulfur precursor                      | NbCl <sub>5</sub>  | CS <sub>2</sub>                                   | 280 °C             | 2 h                        | OIAm                         | 1:10                                  | 8 mL                       | 1.0                       |                    | Ultrathin nanosheets (~2 μm)            | 20   |
|                   |                                                        |                    |                                                   | 300 °C             |                            |                              | 1:10                                  |                            |                           |                    | Ultrathin nanosheets (~3 μm)            |      |
|                   |                                                        |                    |                                                   | 280 °C             |                            |                              | 1:60                                  |                            |                           |                    | Stacked nanodisks (~300 nm)             |      |
|                   |                                                        |                    |                                                   | 300 °C             |                            |                              | 1:60                                  |                            |                           |                    | Stacked nanodisks (~500 nm)             |      |
| NbSe <sub>2</sub> | Heat-up                                                | NbCl <sub>5</sub>  | Se                                                | 280 °C             | 4 h                        | OIAm                         | 1:2                                   | 20 mL                      | 1                         |                    | Depends on cooling rate:                | 21   |

| Material                        | Methodology                       | Metal Precursor(s) | Chalcogenide Precursor               | Temp. <sup>b</sup> | Reaction Time <sup>c</sup> | Solvent/Ligands <sup>d</sup>     | Stoichiometry (M:(M'):E) <sup>e</sup> | Total Solvent <sup>f</sup> | Scale (mmol) <sup>g</sup> | Yield <sup>h</sup> | Morphology/Size                                                                    | Ref. |
|---------------------------------|-----------------------------------|--------------------|--------------------------------------|--------------------|----------------------------|----------------------------------|---------------------------------------|----------------------------|---------------------------|--------------------|------------------------------------------------------------------------------------|------|
|                                 |                                   |                    |                                      | 250 °C             |                            | DDA                              |                                       |                            |                           |                    | nanoplates (slow cooling) or nanowires (fast cooling) <sup>k</sup>                 |      |
| NbSe <sub>2</sub>               | Heat-up                           | NbCl <sub>5</sub>  | Se                                   | 300 °C             | 2 h                        | OM                               | 1:2                                   | 11.2 mmol                  | 0.73                      |                    | Irregular nanoparticles (45 nm)                                                    | 6    |
| NbSe <sub>2</sub>               | Heat-up                           | NbCl <sub>5</sub>  | Se, SeO <sub>2</sub> , or selenourea | 320 °C             | 2 h                        | OM                               | 1:4                                   | 0.125 M concentration      | (not given)               |                    | Nanosheets; oxide impurities present when Se or SeO <sub>2</sub> used as precursor | 22   |
| NbSe <sub>2</sub>               | Hot-injection of metal precursor  | NbCl <sub>5</sub>  | Se                                   | 300 °C             | 1 h                        | OIAm, ODE (16:5 vol:vol)         | 1:2                                   | 21 mL                      | 0.5                       |                    | Nanosheets                                                                         | 23   |
| Nb <sub>2</sub> Se <sub>9</sub> | Heat-up                           | NbF <sub>5</sub>   | Se, SeO <sub>2</sub> , or selenourea | 320 °C             | 2 h                        | OIAm                             | 1:4                                   | 0.125 M concentration      | -- (not given)            |                    | Nanorods                                                                           | 22   |
| Nb <sub>2</sub> Se <sub>9</sub> | Heat-up                           | NbCl <sub>5</sub>  | Se                                   | 300 °C             | 30 min                     | OIAm, ODE, TOP (35:35:4 vol:vol) | 1:5.6                                 | 74 mL                      | 2.0                       |                    | Flower-like nanoclusters <sup>k</sup>                                              | 24   |
| Nb <sub>2</sub> Se <sub>9</sub> | Heat-up                           | NbCl <sub>5</sub>  | Se                                   | 280 °C             | 2 h                        | ODE                              | 2:9                                   | 20 mL                      | 0.6                       | 57%                | Nanorods (20-100 nm)                                                               | 25   |
|                                 |                                   |                    |                                      |                    |                            | OIAm                             |                                       |                            | 0.6                       | 40%                | Flower-like nanosheet aggregates                                                   |      |
|                                 |                                   |                    |                                      |                    |                            | ODT                              |                                       |                            | 7.5                       | 64%                | Irregular agglomerated nanoparticles                                               |      |
|                                 |                                   |                    |                                      |                    |                            | ODE, OIAm (16:4 vol:vol)         |                                       |                            | 0.6                       | 34%                | Microwires (7 μm)                                                                  |      |
| TaS <sub>2</sub>                | Hot-injection of sulfur precursor | TaCl <sub>5</sub>  | CS <sub>2</sub>                      | 300 °C             | 1.5 h                      | OIAm                             | 1:6.9                                 | 11.2 mmol                  | 0.73                      |                    | Irregular nanoparticles (120 nm)                                                   | 6    |

| Material                          | Methodology                         | Metal Precursor(s)                                               | Chalcogenide Precursor          | Temp. <sup>b</sup> | Reaction Time <sup>c</sup> | Solvent/Ligands <sup>d</sup>      | Stoichiometry (M:(M'):E) <sup>e</sup> | Total Solvent <sup>f</sup> | Scale (mmol) <sup>g</sup> | Yield <sup>h</sup> | Morphology/Size                                                                  | Ref. |
|-----------------------------------|-------------------------------------|------------------------------------------------------------------|---------------------------------|--------------------|----------------------------|-----------------------------------|---------------------------------------|----------------------------|---------------------------|--------------------|----------------------------------------------------------------------------------|------|
| TaS <sub>2</sub>                  | Hot-injection of sulfur precursor   | TaCl <sub>5</sub>                                                | CS <sub>2</sub>                 | 300 °C             | 2 h                        | OIAm, ODE, DDT (12:6:2 vol:vol)   | 1:8                                   | 20 mL                      | 1.0                       |                    | Nanoflakes (~150 nm)                                                             | 26   |
| TaS <sub>2</sub>                  | Hot-injection                       | TaCl <sub>5</sub>                                                | CS <sub>2</sub>                 | 300 °C             | 1.5 h                      | OIAm                              | 1:8                                   | 4 mL                       | 1.17                      |                    | Aggregated nanosheets; morphology/aggregation depends on degassing/drying method | 27   |
| TaSe <sub>2</sub>                 | Heat-up                             | TaCl <sub>5</sub>                                                | Se                              | 300 °C             | 1 h                        | OIAm                              | 1:2                                   | 11.2 mmol                  | 0.73                      |                    | Irregular nanoparticles (150 nm)                                                 | 6    |
| TaSe <sub>2</sub>                 | Heat-up                             | TaCl <sub>5</sub>                                                | Se                              | 305 °C             | 1 h                        | OIAm, ODE (6:9 vol:vol)           | 1:2                                   | 15 mL                      | 1.0                       |                    | Folded nanosheets                                                                | 26   |
| Cu <sub>3</sub> VS <sub>4</sub>   | Hot-injection of sulfur precursor   | V(O)(acac) <sub>2</sub> , Cu(acac) <sub>2</sub>                  | S                               | 230 °C             | 30 min                     | OIAm                              | 2.5:6:8                               | 40 mL                      | 2.0                       |                    | Irregularly-shaped nanoparticles (~10 nm) <sup>k</sup>                           | 28   |
| Cu <sub>3</sub> VS <sub>4</sub>   | Hot-injection of sulfur precursor   | V(O)(acac) <sub>2</sub> , CuI                                    | DDT                             | 280 °C             | 30 min                     | OIAm, ODE, TOP (1:7:0.45 vol:vol) | 1.33:1:10                             | 8.45 mL                    | 0.5                       |                    | Nanocubes (18 nm)                                                                | 29   |
|                                   |                                     |                                                                  |                                 | 250 °C             |                            |                                   |                                       |                            |                           |                    | Nanocubes (9 nm)                                                                 |      |
| Cu <sub>3</sub> VSe <sub>4</sub>  | Hot-injection of copper precursor   | VSe <sub>2</sub> (pre-formed <i>in situ</i> ), CuCl <sub>2</sub> | -- <sup>i</sup>                 | 250 °C             | 1 h                        | OIAm, DDT (23:1 vol:vol)          | 1:1.6:2                               | 24 mL                      | 0.5                       |                    | Nanosheets                                                                       | 15   |
| Cu <sub>3</sub> NbS <sub>4</sub>  | Hot-injection of copper precursor   | CuCl <sub>2</sub> , NbS <sub>2</sub> (pre-formed nanosheets)     | CS <sub>2</sub> <sup>n</sup>    | 300 °C             | 2 h                        | OIAm, DDT (25:1 vol:vol)          | 3:1:33                                | 26 mL                      | 0.5                       |                    | Irregularly-shaped nanoparticles                                                 | 23   |
| Cu <sub>3</sub> NbSe <sub>4</sub> | Hot-injection of copper precursor   | CuCl <sub>2</sub> , NbSe <sub>2</sub> (pre-formed nanosheets)    | -- <sup>i</sup>                 | 300 °C             | 1 h                        | OIAm, ODE (22:5 vol:vol)          | 3:1:4                                 | 27 mL                      | 0.5                       |                    | Irregularly-shaped nanoparticles                                                 | 23   |
| Cu <sub>3</sub> NbSe <sub>4</sub> | Hot-injection of selenium precursor | CuCl, NbCl <sub>5</sub>                                          | Ph <sub>2</sub> Se <sub>2</sub> | 280 °C             | 30 min                     | OIAm                              | 3:1:4                                 | 8 mL                       | 0.1                       |                    | Nanocubes (12 nm)                                                                | 30   |
|                                   |                                     |                                                                  |                                 |                    | 60 min                     |                                   |                                       |                            |                           |                    | Nanocubes (15 nm)                                                                |      |
| Cu <sub>3</sub> TaS <sub>4</sub>  |                                     | CuCl, TaCl <sub>5</sub>                                          | CS <sub>2</sub>                 | 300 °C             | 30 min                     | OIAm                              | 3:1:9.2                               | 14.8 mL                    | 1.5                       |                    | Nanocubes (20 nm) and                                                            | 31   |

| Material                          | Methodology                       | Metal Precursor(s)                                                              | Chalcogenide Precursor | Temp. <sup>b</sup> | Reaction Time <sup>c</sup> | Solvent/Ligands <sup>d</sup>    | Stoichiometry (M:(M'):E) <sup>e</sup> | Total Solvent <sup>f</sup> | Scale (mmol) <sup>g</sup> | Yield <sup>h</sup> | Morphology/Size                           | Ref. |
|-----------------------------------|-----------------------------------|---------------------------------------------------------------------------------|------------------------|--------------------|----------------------------|---------------------------------|---------------------------------------|----------------------------|---------------------------|--------------------|-------------------------------------------|------|
|                                   | Hot-injection of sulfur precursor |                                                                                 |                        |                    |                            |                                 | 1:1:7.7                               |                            | 1.0                       |                    | irregular particles<br>Nanocubes (15 nm)  |      |
| Cu <sub>3</sub> TaS <sub>4</sub>  | Hot-injection of sulfur precursor | CuCl <sub>2</sub> ·2H <sub>2</sub> O, TaCl <sub>5</sub>                         | CS <sub>2</sub>        | 300 °C             | 1 h                        | OIAm, ODE, DDT (17:6:2 vol:vol) | 2:1:5.5                               | 25 mL                      | 1.0                       |                    | Nanocubes (15 nm)                         | 26   |
| Cu <sub>3</sub> TaS <sub>4</sub>  | Hot-injection of copper precursor | CuCl <sub>2</sub> ·2H <sub>2</sub> O, TaS <sub>2</sub> (pre-formed nanosheets)  | ... <sup>i</sup>       | 300 °C             | 1 h                        | OIAm, ODE, DDT (17:6:2 vol:vol) | 1.55:1:8.3                            | 25 mL                      | 0.5                       |                    | Nanocubes (20 nm)                         | 26   |
| Cu <sub>3</sub> TaSe <sub>4</sub> | Hot-injection of metal precursors | CuCl <sub>2</sub> ·2H <sub>2</sub> O, TaCl <sub>5</sub>                         | Se                     | 300 °C             | 1 h                        | OIAm, ODE (17:8 vol:vol)        | 1:1:2                                 | 25 mL                      | 0.3                       |                    | Ill-defined core-shell particles (~20 nm) | 26   |
| Cu <sub>3</sub> TaSe <sub>4</sub> | Hot-injection of copper precursor | CuCl <sub>2</sub> ·2H <sub>2</sub> O, TaSe <sub>2</sub> (pre-formed nanosheets) | ... <sup>i</sup>       | 305 °C             | 30 min                     | OIAm, ODE (14:6 vol: vol)       | 1.45:1:2                              | 20 mL                      | 0.5                       |                    | Irregularly-sized nanocubes               | 26   |

<sup>a</sup>Table gives an overview of reaction time, temperature, stoichiometry, and concentrations. Other aspects of the procedure (such as injection rate, heating rate, degassing procedure, work-up, etc) are not included here but may be important to the reaction outcome; the original reference should be consulted for additional details. Some sources described the optimization/study of a range of different conditions; a subset of representative examples are included in the table and are grouped together.

Abbreviations: OIAm = oleylamine; ODE = octadecene; OIAc = oleic acid; DDT = dodecanethiol; ODT = octadecanethiol; HDA = hexadecylamine; DDA = dodecylamine; TDA = tetradecylamine; TOP = trioctylphosphine; TOPO = trioctylphosphine oxide.

<sup>b</sup>Temperature corresponds to the final reaction temperature after any prior drying/degassing and heat-up steps, unless otherwise specified.

<sup>c</sup>Listed time corresponds to the time the reaction is held at the final reaction temperature, not including the time for any prior drying/degassing and heat-up steps.

<sup>d</sup>Gives the final solvent/ligand composition after all precursor solutions have been combined; ratio is given as either vol/vol or mol/mol in accordance with what is given in the original reference.

<sup>e</sup>For ternary materials, metals are given in the same order as listed in the “metal precursors” column. For sulfide reactions including DDT as a co-solvent in addition to a more reactive sulfide source such as CS<sub>2</sub>, DDT is not included in the sulfur stoichiometry although it could potentially act as a source of sulfur in the reaction. For reactions using elemental sulfur, stoichiometry is based on moles of S (not S<sub>8</sub>). For cascade reactions starting from pre-formed but not isolated nanosheets, given stoichiometry includes the amount of precursors used in the first step to form the nanosheets.

<sup>f</sup>Total volume after all precursor solutions have been combined, given in either mL or mmol according to how it was reported in the original reference.

<sup>g</sup>Scale is given as theoretical yield of the product material.

<sup>h</sup>Most references do not report yield; where given in terms of mass or percent yield, it is provided here as reported.

<sup>i</sup>Procedure used a “single source precursor” where the chalcogenide source is also one of the metal precursors.

<sup>k</sup>Solid-state annealing step was carried out after solution-phase synthesis.

<sup>m</sup>A yield of 1.1593 g (91%) was given for a “gram-scale” version of the synthesis, but further details for the scaled-up reaction were not explicitly provided.

<sup>n</sup>Additional CS<sub>2</sub> was added after the preparation of the pre-formed nanosheets.

## References:

- 1 Y. Ding, J. Gu, T. Zhang, A.-X. Yin, L. Yang, Y.-W. Zhang and C.-H. Yan, *J. Am. Chem. Soc.*, 2012, **134**, 3255–3264.
- 2 K. H. Park, J. Choi, H. J. Kim, D.-H. Oh, J. R. Ahn and S. U. Son, *Small*, 2008, **4**, 945–950.
- 3 S. Prabakar, C. W. Bumby and R. D. Tilley, *Chem. Mater.*, 2009, **21**, 1725–1730.
- 4 S. Prabakar, S. Collins, B. Northover and R. D. Tilley, *Chem. Commun.*, 2010, **47**, 439–441.
- 5 V. V. Plashnitsa, F. Vietmeyer, N. Petchsang, P. Tongying, T. H. Kosel and M. Kuno, *J. Phys. Chem. Lett.*, 2012, **3**, 1554–1558.
- 6 S. Jeong, D. Yoo, J. Jang, M. Kim and J. Cheon, *J. Am. Chem. Soc.*, 2012, **134**, 18233–18236.
- 7 D. Yoo, M. Kim, S. Jeong, J. Han and J. Cheon, *J. Am. Chem. Soc.*, 2014, **136**, 14670–14673.
- 8 J. Jang, S. Jeong, J. Seo, M.-C. Kim, E. Sim, Y. Oh, S. Nam, B. Park and J. Cheon, *J. Am. Chem. Soc.*, 2011, **133**, 7636–7639.
- 9 D. Zilevu and S. E. Creutz, *Chem. Mater.*, 2021, **33**, 5137–5146.
- 10 N. E. Ingram, B. J. Jordan, B. Donnadieu and S. E. Creutz, *Dalton Trans.*, 2021, **50**, 15978–15982.
- 11 D. Zilevu, O. O. Parks and S. E. Creutz, *Chem. Commun.*, 2022, **58**, 10512–10515.
- 12 R. Yang, A. D. Jess, C. Fai and C. J. Hages, *J. Am. Chem. Soc.*, 2022, **144**, 15928–15931.
- 13 Z. Guo, L. Yang, W. Wang, L. Cao and B. Dong, *J. Mater. Chem. A*, 2018, **6**, 14681–14688.
- 14 W. Zhao, B. Dong, Z. Guo, G. Su, R. Gao, W. Wang and L. Cao, *Chem. Commun.*, 2016, **52**, 9228–9231.
- 15 M. Liu, C.-Y. Lai, M. Zhang and D. R. Radu, *Sci. Rep.*, 2020, **10**, 21679.
- 16 W. Feng, M. Cheng, R. Du, Y. Wang, P. Wang, H. Li, L. Song, X. Wen, J. Yang, X. Li, J. He and J. Shi, *Adv. Mater. Interfaces*, 2022, **9**, 2200060.
- 17 J. Zhang, J. Li, H. Huang, W. Chen, Y. Cui, Y. Li, W. Mao, X. Zhu and X. Li, *Small*, 2022, **18**, 2204557.
- 18 J. Zhang, C. Du, Z. Dai, W. Chen, Y. Zheng, B. Li, Y. Zong, X. Wang, J. Zhu and Q. Yan, *ACS Nano*, 2017, **11**, 10599–10607.
- 19 A. Mansouri and N. Semagina, *ACS Appl. Nano Mater.*, 2018, **1**, 4408–4412.
- 20 W. Li, X. Wei, H. Dong, Y. Ou, S. Xiao, Y. Yang, P. Xiao and Y. Zhang, *Front. Chem.*, 2020, **8**, 189.
- 21 P. Sekar, E. C. Greyson, J. E. Barton and T. W. Odom, *J. Am. Chem. Soc.*, 2005, **127**, 2054–2055.
- 22 T. Kolokoto, V. Mashindi, R. Kadzutu-Sithole, L. F. E. Machogo-Phao, Z. B. Ndala, N. P. Shumbula, S. S. Nkabinde, G. N. Ngubeni, S. S. Gqoba, K. P. Mubiayi and N. Moloto, *RSC Adv.*, 2021, **11**, 31159–31173.
- 23 C.-Y. Chang, R. Prado-Rivera, M. Liu, C.-Y. Lai and D. R. Radu, *ACS Nanosci. Au*, 2022, **2**, 440–447.
- 24 X. Wu, B. Wu, H. Wang, Q. Zhuang, Z. Xiong, H. Yi, P. Xu, G. Shi, Y. Guo and B. Wang, *Energy Fuels*, 2021, **35**, 11563–11571.
- 25 T. Y. Kim, C. Woo, K. H. Choi, X. Dong, J. Jeon, J. Ahn, X. Zhang, J. Kang, H.-S. Oh, H. K. Yu and J.-Y. Choi, *Nanoscale*, 2022, **14**, 17365–17371.
- 26 M. Liu, C.-Y. Lai, C.-Y. Chang and D. R. Radu, *Crystals*, 2021, **11**, 51.
- 27 W. Shen, L. Qiao, J. Ding and Y. Sui, *J. Alloys Compd.*, 2023, **935**, 167877.
- 28 C.-C. Chen, K. H. Stone, C.-Y. Lai, K. D. Dobson and D. Radu, *Mater. Lett.*, 2018, **211**, 179–182.
- 29 V. Mantella, S. Ninova, S. Saris, A. Loiudice, U. Aschauer and R. Buonsanti, *Chem. Mater.*, 2019, **31**, 532–540.
- 30 Y. Zhao, M. Liu, W. Zhang, X. Sun, W. Wang, W. Zhang, M. Tang, W. Ren, M. Sun, W. Feng and W. Wang, *Dalton Trans.*, 2022, **51**, 16937–16944.
- 31 A. Haque, S. Ershadrad, T. D. Chonamada, D. Saha, B. Sanyal and P. K. Santra, *J. Mater. Chem. A*, 2022, **10**, 19925–19934.
